# Supplementary material for: Drosophila mushroom bodies integrate hunger and satiety signals to control innate food-seeking behavior
Source: eLife journal article supplement (doi:10.7554/elife.35264), 2018-03-16
Supplement: supp [file elife-35264-supp-v1.zip]

Archive with 23 entries (23 files):
- elife_poa_e35264_Figure_10_figure_supplement_1.jpg
- elife_poa_e35264_Figure_5_figure_supplement_1.jpg
- elife_poa_e35264_Figure_6_figure_supplement_3.jpg
- elife_poa_e35264_Figure_12_figure_supplement_1.jpg
- elife_poa_e35264_Figure_3_figure_supplement_3.jpg
- elife_poa_e35264_Figure_10_figure_supplement_2.jpg
- elife_poa_e35264_Figure_3_figure_supplement_1.jpg
- elife_poa_e35264_Figure_4_figure_supplement_2.jpg
- elife_poa_e35264_Figure_7_figure_supplement_2.jpg
- elife_poa_e35264_Source_code_file_1.m
- elife_poa_e35264_Source_code_file_2.m
- elife_poa_e35264_Figure_7_figure_supplement_1.jpg
- elife_poa_e35264_Transparent_Reporting_File.pdf
- elife_poa_e35264_Figure_6_figure_supplement_2.jpg
- elife_poa_e35264_Figure_11_figure_supplement_1.jpg
- elife_poa_e35264_Figure_8_figure_supplement_1.jpg
- elife_poa_e35264_Figure_9_figure_supplement_1.jpg
- elife_poa_e35264_Figure_10_figure_supplement_3.jpg
- elife_poa_e35264_Figure_2_figure_supplement_1.jpg
- elife_poa_e35264_Video_1.mp4
- elife_poa_e35264_Figure_3_figure_supplement_2.jpg
- elife_poa_e35264_Figure_4_figure_supplement_1.jpg
- elife_poa_e35264_Figure_6_figure_supplement_1.jpg
