# Supplementary material for: Drosophila mushroom bodies integrate hunger and satiety signals to control innate food-seeking behavior
Source: eLife journal article supplement (doi:10.7554/elife.35264), 2018-03-16
Supplement: supp [file elife-35264-supp-v1.zip › elife_poa_e35264_Source_code_file_1.m]

%This code is written based on the Matlab's built in script, Motion-Based Multiple Object Tracking


function tracks =  mytrackingrefresh()

myDir = uigetdir;%Get the directory of the video
myFiles = dir(fullfile(myDir,'*.avi')); %gets all mp4 files in struct

            
for N = 1:length(myFiles)%Loop through every file in the directory

disp(myFiles(N).name);

fname = strcat(myFiles(N).name,'.mat');

obj = setupSystemObjects();

tracks = initializeTracks(); % Create an empty array of tracks.

nextId = 1; % ID of the next track

disp('Total number of frames');
disp(obj.reader2.NumberOfFrames);

totalframenum = obj.reader2.NumberOfFrames;
wholepos = zeros(totalframenum,2);%Declare a array for hodling the positions
  for k = 1: totalframenum % Loop through every frame in the video

    if (k < 30)

    frame = deleteframe();

      else

        frame = readFrames();

    [centroids, bboxes, mask] = detectObjects(frame);
    predictNewLocationsOfTracks();
    [assignments, unassignedTracks, unassignedDetections] = ...
        detectionToTrackAssignment();
    if isempty(tracks)%Only create tracks when it is empty, therefore only creating one


         createNewTracks();

    end

    updateAssignedTracks();
    updateUnassignedTracks();
    displayTrackingResults();

 end
end

disp(wholepos);
 save(fname,'wholepos');
end
    
 % After processing the video, ask the user whether to save the .m file


    function obj = setupSystemObjects()
        
        % Create a video file reader.
        obj.reader = VideoReader(myFiles(N).name);
         obj.reader2 = VideoReader(myFiles(N).name);%This is for reading total video frames
        totalframe = obj.reader2.NumberOfFrames;
        obj.videoPlayer = vision.VideoPlayer('Position', [20, 200, 600, 600]);
        obj.maskPlayer = vision.VideoPlayer('Position', [740, 200, 600, 600])

        obj.detector = vision.ForegroundDetector('NumGaussians', 3, ...
            'NumTrainingFrames', 70, 'MinimumBackgroundRatio', 0.7,'LearningRate',0.00005); %default is 3, 105, 0.7, 0.000005

        obj.blobAnalyser = vision.BlobAnalysis('BoundingBoxOutputPort', true, ...
            'AreaOutputPort', true, 'CentroidOutputPort', true, 'LabelMatrixOutputPort', true , 'MinimumBlobArea', 60, 'ExtentOutputPort',true ,'MaximumCount', 1, ...
             'MajorAxisLengthOutputPort',true,'MinorAxisLengthOutputPort',true,'OrientationOutputPort',true);

    end

    function tracks = initializeTracks()


        % create an empty array of tracks
        % Tracks obj includes various features such as the following
        tracks = struct(...
             'id', {}, ...
             'bbox', {}, ...
             'kalmanFilter', {}, ...
             'age', {}, ...
             'totalVisibleCount', {}, ...
             'consecutiveInvisibleCount', {} ,...
             'active',{});
    end

    function frame = deleteframe()


        
    frame = readFrame(obj.reader);
    frame = [];


        end
    function frame = readFrames()

        frame = readFrame(obj.reader);
    end

    function [centroids, bboxes, mask] = detectObjects(frame)


        % Detect foreground.
        mask = obj.detector.step(frame);
        mask = imopen(mask, strel('square', 5));
        mask = imclose(mask, strel('rectangle', [15,15]));
        mask = imfill(mask, 'holes');


         [ ~,centroids, bboxes ] = obj.blobAnalyser.step(mask);  % Perform blob analysis to find connected components.
 
        end

    function predictNewLocationsOfTracks()
        for i = 1:length(tracks)
            bbox = tracks(i).bbox;

            % Predict the current location of the track.
            predictedCentroid = predict(tracks(i).kalmanFilter);

            % Shift the bounding box so that its center is at
            % the predicted location.
            predictedCentroid = int32(predictedCentroid) - bbox(3:4) / 2;
            tracks(i).bbox = [predictedCentroid, bbox(3:4)];
        end
    end


    function [assignments, unassignedTracks, unassignedDetections] = ...
            detectionToTrackAssignment()

        nTracks = length(tracks);
        nDetections = size(centroids, 1);

        % Compute the cost of assigning each detection to each track.
        cost = zeros(nTracks, nDetections);
        for i = 1:nTracks
            cost(i, :) = distance(tracks(i).kalmanFilter, centroids);
        end

        % Solve the assignment problem.
        costOfNonAssignment = 20;
        [assignments, unassignedTracks, unassignedDetections] = ...
            assignDetectionsToTracks(cost, costOfNonAssignment);
    end


    function updateAssignedTracks()
        numAssignedTracks = size(assignments, 1);
        for i = 1:numAssignedTracks
            trackIdx = assignments(i, 1);
            detectionIdx = assignments(i, 2);
            centroid = centroids(detectionIdx, :);
            bbox = bboxes(detectionIdx, :);

            
            correct(tracks(trackIdx).kalmanFilter, centroid);         
            tracks(trackIdx).bbox = bbox;
            tracks(trackIdx).age = tracks(trackIdx).age + 1;       
            tracks(trackIdx).totalVisibleCount = ...
                tracks(trackIdx).totalVisibleCount + 1;
            tracks(trackIdx).consecutiveInvisibleCount = 0;
        end
    end


    function updateUnassignedTracks()
        for i = 1:length(unassignedTracks)
            ind = unassignedTracks(i);
            tracks(ind).age = tracks(ind).age + 1;
            tracks(ind).consecutiveInvisibleCount = ...
                tracks(ind).consecutiveInvisibleCount + 1;
        end
    end


    function createNewTracks()


        centroids = centroids(unassignedDetections, :);
        bboxes = bboxes(unassignedDetections, :);

         for i = 1:size(centroids, 1)

            centroid = centroids(i,:);
            bbox = bboxes(i, :);


            % Create a Kalman filter object.
            kalmanFilter = configureKalmanFilter('ConstantVelocity', ...
                centroid, [200, 50], [100, 25], 50);

            newTrack = struct(...
                'id', nextId, ...
                'bbox', bbox, ...
                'kalmanFilter', kalmanFilter, ...
                'age', 1, ...
                'totalVisibleCount', 1, ...
                'consecutiveInvisibleCount', 0,...
                 'active',true);


            % Add it to the array of tracks.
            tracks(end + 1) = newTrack;

            % Increment the next id.
            nextId = nextId + 1;

          end

    end

    function displayTrackingResults()
        % Convert the frame and the mask to uint8 RGB.
        frame = im2uint8(frame);
        mask = uint8(repmat(mask, [1, 1, 3])) .* 255;
        mask = insertShape(mask,'circle',[260 260 250],'LineWidth', 5); % Set the center of the dish. Default was 1024 1024 450
          frame = insertShape(frame, 'circle', [260 260 1], 'LineWidth', 5); % Set the center of the dish. Default was 1024 1024 1


        minVisibleCount = 20;


        if ~isempty(tracks)

            reliableTrackInds = ...
                [tracks(:).totalVisibleCount] > minVisibleCount & [tracks(:).active];
            reliableTracks = tracks(reliableTrackInds);


            % Display the objects. If an object has not been detected
            % in this frame, display its predicted bounding box.
            if ~isempty(reliableTracks)
                % Get bounding boxes.
                bboxes = cat(1, reliableTracks.bbox); %
                x = double(bboxes(:,1)+bboxes(:,3)/2);
                y = double(bboxes(:,2)+bboxes(:,4)/2);
                 wholepos(k,1) = x;
                 wholepos(k,2) = y;

                % Get ids.
                ids = int32([reliableTracks(:).id]);

                % Create labels for objects indicating the ones for
                % which we display the predicted rather than the actual
                % location.
                labels = cellstr(int2str(ids'));
                predictedTrackInds = ...
                [reliableTracks(:).consecutiveInvisibleCount] > 0;
                isPredicted = cell(size(labels));
                isPredicted(predictedTrackInds) = {'predicted'};
                labels = strcat(labels, isPredicted);

                % Draw the objects on the frame.
                frame = insertObjectAnnotation(frame, 'rectangle',  bboxes, labels,'Color','cyan');

                % Draw the objects on the mask.
                mask = insertObjectAnnotation(mask, 'rectangle', bboxes, labels);


               % Extracting centroid position
               
                for  ii=1:length(reliableTracks)


                trackage = tracks(:).age;


                end
            end
        % Display the mask and the frame.
        obj.maskPlayer.step(mask);
        obj.videoPlayer.step(frame);
        

    end
    end


end
